# Supplementary material for: Molecular characteristics of plant UDP-arabinopyranose mutases
Source: PubMed Central journal article supplement — Glycobiology. 2019 May 15;29(12):839–46. doi: 10.1093/glycob/cwz067 (PMC6861824; doi:10.1093/glycob/cwz067), 2019-05-15
Supplement: gt75_all_linux_edit_cwz067.pdf [file gt75_all_linux_edit_cwz067.pdf]

| logo       | 4      | 3                    | 2                                               | 1                        |     |     |
|------------|--------|----------------------|-------------------------------------------------|--------------------------|-----|-----|
| ABW68210.1 | .      | .                    | .                                               | 0                        |     |     |
| CAJ53615.1 | .      | .                    | .                                               | 0                        |     |     |
| AEP12366.1 | .      | .                    | .                                               | 0                        |     |     |
| ABC42557.1 | .      | .                    | .                                               | 0                        |     |     |
| CQR59630.1 | .      | .                    | .                                               | 0                        |     |     |
| CAD62189.1 | .      | .                    | .                                               | 0                        |     |     |
| AET51853.1 | .      | .                    | .                                               | 0                        |     |     |
| SDS74742.1 | .      | .                    | .                                               | 0                        |     |     |
| AMV40976.1 | .      | .                    | .                                               | 0                        |     |     |
| BAA96988.1 | .      | .                    | .                                               | 0                        |     |     |
| VDC91124.1 | .      | .                    | .                                               | 0                        |     |     |
| VDC80779.1 | .      | .                    | .                                               | 0                        |     |     |
| BAF46284.1 | .      | .                    | .                                               | 0                        |     |     |
| BAT79816.1 | .      | .                    | .                                               | 0                        |     |     |
| APW77263.1 | .      | .                    | .                                               | 5                        |     |     |
| AAF07834.1 | .      | .                    | .                                               | 0                        |     |     |
| VDC81582.1 | .      | .                    | .                                               | 0                        |     |     |
| VDD47005.1 | .      | .                    | .                                               | 0                        |     |     |
| VDD27545.1 | .      | .                    | .                                               | 0                        |     |     |
| AAB61671.1 | .      | .                    | .                                               | 0                        |     |     |
| ATG88116.1 | .      | .                    | .                                               | 0                        |     |     |
| ABK94330.1 | .      | .                    | .                                               | 0                        |     |     |
| APR63795.1 | .      | .                    | .                                               | 0                        |     |     |
| ACU18769.1 | .      | .                    | .                                               | 0                        |     |     |
| BAU01399.1 | .      | .                    | .                                               | 0                        |     |     |
| ACU24537.1 | .      | .                    | .                                               | 0                        |     |     |
| BAT83231.1 | .      | .                    | .                                               | 0                        |     |     |
| AAR13306.1 | .      | .                    | .                                               | 0                        |     |     |
| ABD96930.1 | .      | .                    | .                                               | 0                        |     |     |
| ABD96890.1 | .      | .                    | .                                               | 0                        |     |     |
| ABD96835.1 | .      | .                    | .                                               | 0                        |     |     |
| AAM52234.1 | .      | .                    | .                                               | 0                        |     |     |
| VDC85395.1 | .      | .                    | .                                               | 0                        |     |     |
| VDD19419.1 | .      | .                    | .                                               | 0                        |     |     |
| VDC78833.1 | .      | .                    | .                                               | 0                        |     |     |
| VDD33664.1 | .      | .                    | .                                               | 0                        |     |     |
| VDD19461.1 | .      | .                    | .                                               | 0                        |     |     |
| AAP68280.1 | .      | .                    | .                                               | 0                        |     |     |
| VDD53527.1 | .      | .                    | .                                               | 0                        |     |     |
| VDD26233.1 | .      | .                    | .                                               | 0                        |     |     |
| VDC73436.1 | .      | .                    | .                                               | 0                        |     |     |
| VDD47550.1 | .      | .                    | .                                               | 0                        |     |     |
| ACF87732.1 | .      | .                    | .                                               | 0                        |     |     |
| ACF84514.1 | .      | .                    | .                                               | 0                        |     |     |
| AAB49896.1 | .      | .                    | .                                               | 0                        |     |     |
| CAA77235.1 | .      | .                    | .                                               | 0                        |     |     |
| AAN08217.1 | .      | .                    | .                                               | 0                        |     |     |
| CAA77237.1 | .      | .                    | .                                               | 0                        |     |     |
| AKZ17608.1 | .      | .                    | .                                               | 0                        |     |     |
| AFK49282.1 | .      | .                    | .                                               | 0                        |     |     |
| AAB88408.1 | .      | .                    | .                                               | 0                        |     |     |
| CAC83750.1 | .      | .                    | .                                               | 0                        |     |     |
| CAN69560.1 | .      | .                    | .                                               | 0                        |     |     |
| AGE46030.1 | .      | .                    | .                                               | 0                        |     |     |
| CDM84286.1 | .      | .                    | .                                               | 0                        |     |     |
| AKZ17610.1 | .      | .                    | .                                               | 0                        |     |     |
| QAX90478.1 | .      | .                    | .                                               | 0                        |     |     |
| AJD87532.1 | .      | .                    | .                                               | 0                        |     |     |
| AKZ17609.1 | .      | .                    | .                                               | 0                        |     |     |
| BAC83877.1 | .      | .                    | .                                               | 0                        |     |     |
| ACG33746.1 | .      | .                    | .                                               | 0                        |     |     |
| CAC84517.1 | .      | .                    | .                                               | 0                        |     |     |
| ABK21236.1 | .      | .                    | .                                               | 0                        |     |     |
| CAB64206.2 | .      | .                    | .                                               | 0                        |     |     |
| AFX67042.1 | .      | .                    | .                                               | 0                        |     |     |
| AAT44738.1 | .      | .                    | .                                               | 0                        |     |     |
| AFK42305.1 | .      | .                    | .                                               | 0                        |     |     |
| AFK40119.1 | .      | .                    | .                                               | 0                        |     |     |
| ACU19796.1 | .      | .                    | .                                               | 0                        |     |     |
| ACU23018.1 | .      | .                    | .                                               | 0                        |     |     |
| AAB61672.1 | .      | .                    | .                                               | 0                        |     |     |
| BAT99160.1 | .      | .                    | .                                               | 0                        |     |     |
| AGV54358.1 | .      | .                    | .                                               | 0                        |     |     |
| BAF16057.1 | .      | .                    | .                                               | 0                        |     |     |
| CAA77234.1 | .      | .                    | .                                               | 0                        |     |     |
| ACF86668.1 | .      | .                    | .                                               | 0                        |     |     |
| ACG43402.1 | .      | .                    | .                                               | 0                        |     |     |
| AKZ17611.1 | .      | .                    | .                                               | 0                        |     |     |
| BAJ88947.1 | .      | .                    | .                                               | 0                        |     |     |
| SPT20324.1 | .      | .                    | .                                               | 0                        |     |     |
| CAA77236.1 | .      | .                    | .                                               | 0                        |     |     |
| CAN80500.1 | MAGTGP | IPELDILLACEQIQWSRNGG | EDERIKTHENEKYRLQRVRTLHLGVVDEVEEARLLVRIPQVPAGDGI | EKHHEEXESPDSGTAVVDEERRGQ | RVL | 100 |
| ABD28560.1 | .      | .                    | .                                               | 0                        |     |     |
| AAM66046.1 | .      | .                    | .                                               | 0                        |     |     |
| VDD33573.1 | .      | .                    | .                                               | 0                        |     |     |
| VDD19317.1 | .      | .                    | .                                               | 0                        |     |     |
| AJA92657.1 | .      | .                    | .                                               | 0                        |     |     |
| AOV94704.1 | .      | .                    | .                                               | 0                        |     |     |
| CAJ52658.1 | .      | .                    | .                                               | 0                        |     |     |
| CCC40659.1 | .      | .                    | .                                               | 0                        |     |     |
| AEN04839.1 | .      | .                    | .                                               | 0                        |     |     |
| AZH26594.1 | .      | .                    | .                                               | 0                        |     |     |
| AXG07954.1 | .      | .                    | .                                               | 0                        |     |     |
| AXG11367.1 | .      | .                    | .                                               | 0                        |     |     |
| AUV82097.1 | .      | .                    | .                                               | 0                        |     |     |
| AWB26477.1 | .      | .                    | .                                               | 0                        |     |     |
| AQL44377.1 | .      | .                    | .                                               | 0                        |     |     |
| AGN01787.1 | .      | .                    | .                                               | 0                        |     |     |
| ADQ67080.1 | .      | .                    | .                                               | 0                        |     |     |
| AUG47369.1 | .      | .                    | .                                               | 0                        |     |     |
| AAV45881.1 | .      | .                    | .                                               | 0                        |     |     |
| AEM57147.1 | .      | .                    | .                                               | 0                        |     |     |
| AHB65933.1 | .      | .                    | .                                               | 0                        |     |     |
| AJF27072.1 | .      | .                    | .                                               | 0                        |     |     |
| ACV48390.1 | .      | .                    | .                                               | 0                        |     |     |
| ADJ15312.1 | .      | .                    | .                                               | 0                        |     |     |
| CCQ37667.1 | .      | .                    | .                                               | 0                        |     |     |
| AFK19498.1 | .      | .                    | .                                               | 0                        |     |     |
| AHZ21160.1 | .      | .                    | .                                               | 0                        |     |     |
| ADE03063.1 | .      | .                    | .                                               | 0                        |     |     |
| AKU07755.1 | .      | .                    | .                                               | 0                        |     |     |
| ACM55766.1 | .      | .                    | .                                               | 0                        |     |     |
| QAU13129.1 | .      | .                    | .                                               | 0                        |     |     |
| AZQ13471.1 | .      | .                    | .                                               | 0                        |     |     |
| QAY18675.1 | .      | .                    | .                                               | 0                        |     |     |
| ATW88543.1 | .      | .                    | .                                               | 0                        |     |     |
| AGB17244.1 | .      | .                    | .                                               | 0                        |     |     |
| AEH36670.1 | .      | .                    | .                                               | 0                        |     |     |
| APW97619.1 | .      | .                    | .                                               | 0                        |     |     |
| AF057429.1 | .      | .                    | .                                               | 0                        |     |     |
| AGB30672.1 | .      | .                    | .                                               | 0                        |     |     |
| ACV12047.1 | .      | .                    | .                                               | 0                        |     |     |
| CCQ33920.1 | .      | .                    | .                                               | 0                        |     |     |
| AAG19356.1 | .      | .                    | .                                               | 0                        |     |     |
| CAP13627.1 | .      | .                    | .                                               | 0                        |     |     |
| AHG03719.1 | .      | .                    | .                                               | 0                        |     |     |
| CQH54592.1 | .      | .                    | .                                               | 0                        |     |     |

| Logo       | 4<br>3<br>2<br>1                                                        | 10                                          | 4<br>3<br>2<br>1 |
|------------|-------------------------------------------------------------------------|---------------------------------------------|------------------|
| ABW68210.1 |                                                                         |                                             | 0                |
| CAJ53615.1 |                                                                         |                                             | 0                |
| AEP12366.1 |                                                                         |                                             | 0                |
| ABC42557.1 |                                                                         |                                             | 0                |
| CQR59630.1 |                                                                         |                                             | 0                |
| CAD62189.1 |                                                                         | MPDHEPAIPADRAD                              | 14               |
| AET51853.1 |                                                                         | MS                                          | 2                |
| SDS74742.1 |                                                                         | MSTLAVDPADQRRP                              | 15               |
| AMV40976.1 |                                                                         |                                             | 0                |
| BAA96988.1 |                                                                         | MAGYNLEAIEAAP                               | 13               |
| VDC91124.1 |                                                                         | MAGYNLEAIEAAP                               | 13               |
| VDC80779.1 |                                                                         | MAGYNLEAIEAAP                               | 13               |
| BAF46284.1 |                                                                         | MAAP                                        | 4                |
| BAT79816.1 |                                                                         | MSETGATA                                    | 8                |
| APW77263.1 | TVIYLIIQFHSTEFNSIHNSSTSSSSPLYIKPCVHSFVFTLQAKPSLSGRTERSQEEKKHITMAAPSTP   |                                             | 76               |
| AAF07834.1 |                                                                         | MAQLYSSVKPTP                                | 12               |
| VDC81582.1 |                                                                         | MAQLYSSVKPTP                                | 12               |
| VDD47005.1 |                                                                         | MSQLYFSMKPTP                                | 12               |
| VDD27545.1 |                                                                         | MSQLYSSMKPTP                                | 12               |
| AAB61671.1 |                                                                         |                                             | 0                |
| ATG88116.1 |                                                                         | MASATH                                      | 6                |
| ABK94330.1 |                                                                         | MAGSSVKPTP                                  | 10               |
| APR63795.1 |                                                                         | MAGSAIKPTP                                  | 10               |
| ACU18769.1 |                                                                         | MADASVAPPP                                  | 10               |
| BAU01399.1 |                                                                         | MATATSYVTSPPP                               | 13               |
| ACU24537.1 |                                                                         | MASATP                                      | 6                |
| BAT83231.1 |                                                                         | MAAPTP                                      | 6                |
| AAR13306.1 |                                                                         | MAAPTP                                      | 6                |
| ABD96930.1 |                                                                         | MIEPAKTVGIPVNTP                             | 16               |
| ABD96890.1 |                                                                         | MVEPANTVGIPVNTP                             | 16               |
| ABD96835.1 |                                                                         | MVQPANTVGIPVNTP                             | 16               |
| AAM52234.1 |                                                                         | MVEPANTVGLPNTP                              | 16               |
| VDC85395.1 |                                                                         | MVDPANTVGLPNTP                              | 16               |
| VDD19419.1 |                                                                         | MVDPANTVGLPNTP                              | 16               |
| VDC78833.1 |                                                                         | MVDPANTVGIPVNTP                             | 16               |
| VDD33664.1 |                                                                         | MVDPANTVGIPVNTP                             | 16               |
| VDD19461.1 |                                                                         | MVDPANTVGIPVNTP                             | 16               |
| AAP68280.1 |                                                                         | MVEPANTVGIPVNHIP                            | 16               |
| VDD53527.1 |                                                                         | LSLLQFSIESIMVEPANTVGIPLNHTA                 | 27               |
| VDD26233.1 |                                                                         | MVEPANTVGIPLNHTA                            | 16               |
| VDC73436.1 |                                                                         | MVEPANTVGIPLNHTA                            | 16               |
| VDD47550.1 |                                                                         | MFISVSNNASLFLSLSNSIMVEPANTVGIPLNHTA         | 34               |
| ACF87732.1 |                                                                         | MAGTVTVPGSSKPTP                             | 16               |
| ACF84514.1 |                                                                         | MAGTVTVPGSSTPSTP                            | 16               |
| AAB49896.1 |                                                                         | MAGTVTVPGSSTPSTP                            | 16               |
| CAA77235.1 |                                                                         | MAGTVTVSPSPVSTP                             | 16               |
| AAO8217.1  |                                                                         | MAGTVTVSPASVPSTP                            | 16               |
| CAA77237.1 |                                                                         | MAGTVTVPGSSVPSTP                            | 16               |
| AKZ17608.1 |                                                                         | MAGTVTVPGSSVPSTP                            | 16               |
| AFK49282.1 |                                                                         | MASSSKPTP                                   | 9                |
| AAB88408.1 |                                                                         | MASLKPPTP                                   | 9                |
| CAC83750.1 |                                                                         | MATVSPTP                                    | 8                |
| CAN69560.1 |                                                                         | MAGTPATP                                    | 8                |
| AGE46030.1 |                                                                         | MADSASIPNTP                                 | 11               |
| CDM84286.1 |                                                                         | MAP                                         | 3                |
| AKZ17610.1 |                                                                         | MAP                                         | 3                |
| QAX90478.1 |                                                                         | MANSKSSP                                    | 8                |
| AJD87532.1 |                                                                         | MATPTTP                                     | 7                |
| AKZ17609.1 |                                                                         | MAAAPSTP                                    | 8                |
| BAC83877.1 |                                                                         | MASSDAAAQAATP                               | 14               |
| ACG33746.1 |                                                                         | MASASHAPT                                   | 10               |
| CAC84517.1 |                                                                         | MAGSSVTPTP                                  | 10               |
| ABK21236.1 |                                                                         | MAGPAPT                                     | 8                |
| CAB64206.2 |                                                                         | MAAATP                                      | 6                |
| AFX67042.1 |                                                                         | MAAATP                                      | 6                |
| AAT44738.1 |                                                                         | MAAATP                                      | 6                |
| AFK42305.1 |                                                                         |                                             | 0                |
| AFK40119.1 |                                                                         | MATPSVP                                     | 8                |
| ACU19796.1 |                                                                         | MAQPSSSSKPVVP                               | 13               |
| ACU23018.1 |                                                                         | MAEPSSSKPAVP                                | 12               |
| AAB61672.1 |                                                                         |                                             | 0                |
| BAT99160.1 |                                                                         | MADPSKPVVP                                  | 10               |
| AGV54358.1 |                                                                         | MADPSAKPVVP                                 | 10               |
| BAF16057.1 |                                                                         | MSLE                                        | 4                |
| CAA77234.1 |                                                                         | MSLE                                        | 4                |
| ACF86668.1 |                                                                         | MPLE                                        | 4                |
| ACG43402.1 |                                                                         | MPL                                         | 4                |
| AKZ17611.1 |                                                                         | MRTAPTLLALTLDAAALLRIATLRDLRSLPDHILFDLFRRTLS | 42               |
| BAJ88947.1 |                                                                         | MSLE                                        | 4                |
| SPT20324.1 |                                                                         | MSLE                                        | 4                |
| CAA77236.1 |                                                                         | MSLE                                        | 4                |
| CAN80500.1 | LLCFISSNHGCVMPQRRLKAGKLTEKILMLFMATGKDEVLALIQSLNIQLINPVLPTISLSYCSFPLQDAP | R                                           | 172              |
| ABD28560.1 |                                                                         | MSQVI                                       | 5                |
| AAM66046.1 |                                                                         | MSLAE                                       | 5                |
| VDD33573.1 |                                                                         | MSSAE                                       | 5                |
| VDD19317.1 |                                                                         | MSSSE                                       | 5                |
| AJA92657.1 |                                                                         |                                             | 0                |
| AOV94704.1 |                                                                         | M                                           | 1                |
| CAJ52658.1 |                                                                         |                                             | 0                |
| CCC40659.1 |                                                                         |                                             | 0                |
| AEN04839.1 |                                                                         |                                             | 0                |
| AZH26594.1 |                                                                         |                                             | 0                |
| AXG07954.1 |                                                                         |                                             | 0                |
| AXG11367.1 |                                                                         |                                             | 0                |
| AUV82097.1 |                                                                         |                                             | 0                |
| AWB26477.1 |                                                                         | MSPSP                                       | 6                |
| AQL44377.1 |                                                                         |                                             | 0                |
| AGN01787.1 |                                                                         |                                             | 0                |
| ADQ67080.1 |                                                                         |                                             | 0                |
| AUG47369.1 |                                                                         |                                             | 0                |
| AAV45881.1 |                                                                         |                                             | 0                |
| AEM57147.1 |                                                                         |                                             | 0                |
| AHB65933.1 |                                                                         |                                             | 0                |
| AJF27072.1 |                                                                         |                                             | 0                |
| ACV48390.1 |                                                                         |                                             | 0                |
| ADJ15312.1 |                                                                         |                                             | 0                |
| CCQ37667.1 |                                                                         | MQSRPNR                                     | 7                |
| AFK19498.1 |                                                                         |                                             | 0                |
| AHZ21160.1 |                                                                         |                                             | 0                |
| ADE03063.1 |                                                                         |                                             | 0                |
| AKU07755.1 |                                                                         |                                             | 0                |
| ACM55766.1 |                                                                         | MEERRPDA                                    | 8                |
| QAU13129.1 |                                                                         | MVDTPPDA                                    | 8                |
| AZQ13471.1 |                                                                         | MEDSRSTA                                    | 8                |
| QAY18675.1 |                                                                         | MTATAPSG                                    | 8                |
| ATW88543.1 |                                                                         |                                             | 0                |
| AGB17244.1 |                                                                         |                                             | 0                |
| AEH36670.1 |                                                                         |                                             | 0                |
| APW97619.1 |                                                                         |                                             | 0                |
| AF057429.1 |                                                                         |                                             | 0                |
| AGB30672.1 |                                                                         |                                             | 0                |
| ACV12047.1 |                                                                         |                                             | 0                |
| CCQ33920.1 |                                                                         |                                             | 0                |
| AAG19356.1 |                                                                         |                                             | 0                |
| CAP13627.1 |                                                                         |                                             | 0                |
| AHGO3719.1 |                                                                         |                                             | 0                |
| CQH54592.1 |                                                                         |                                             | 0                |



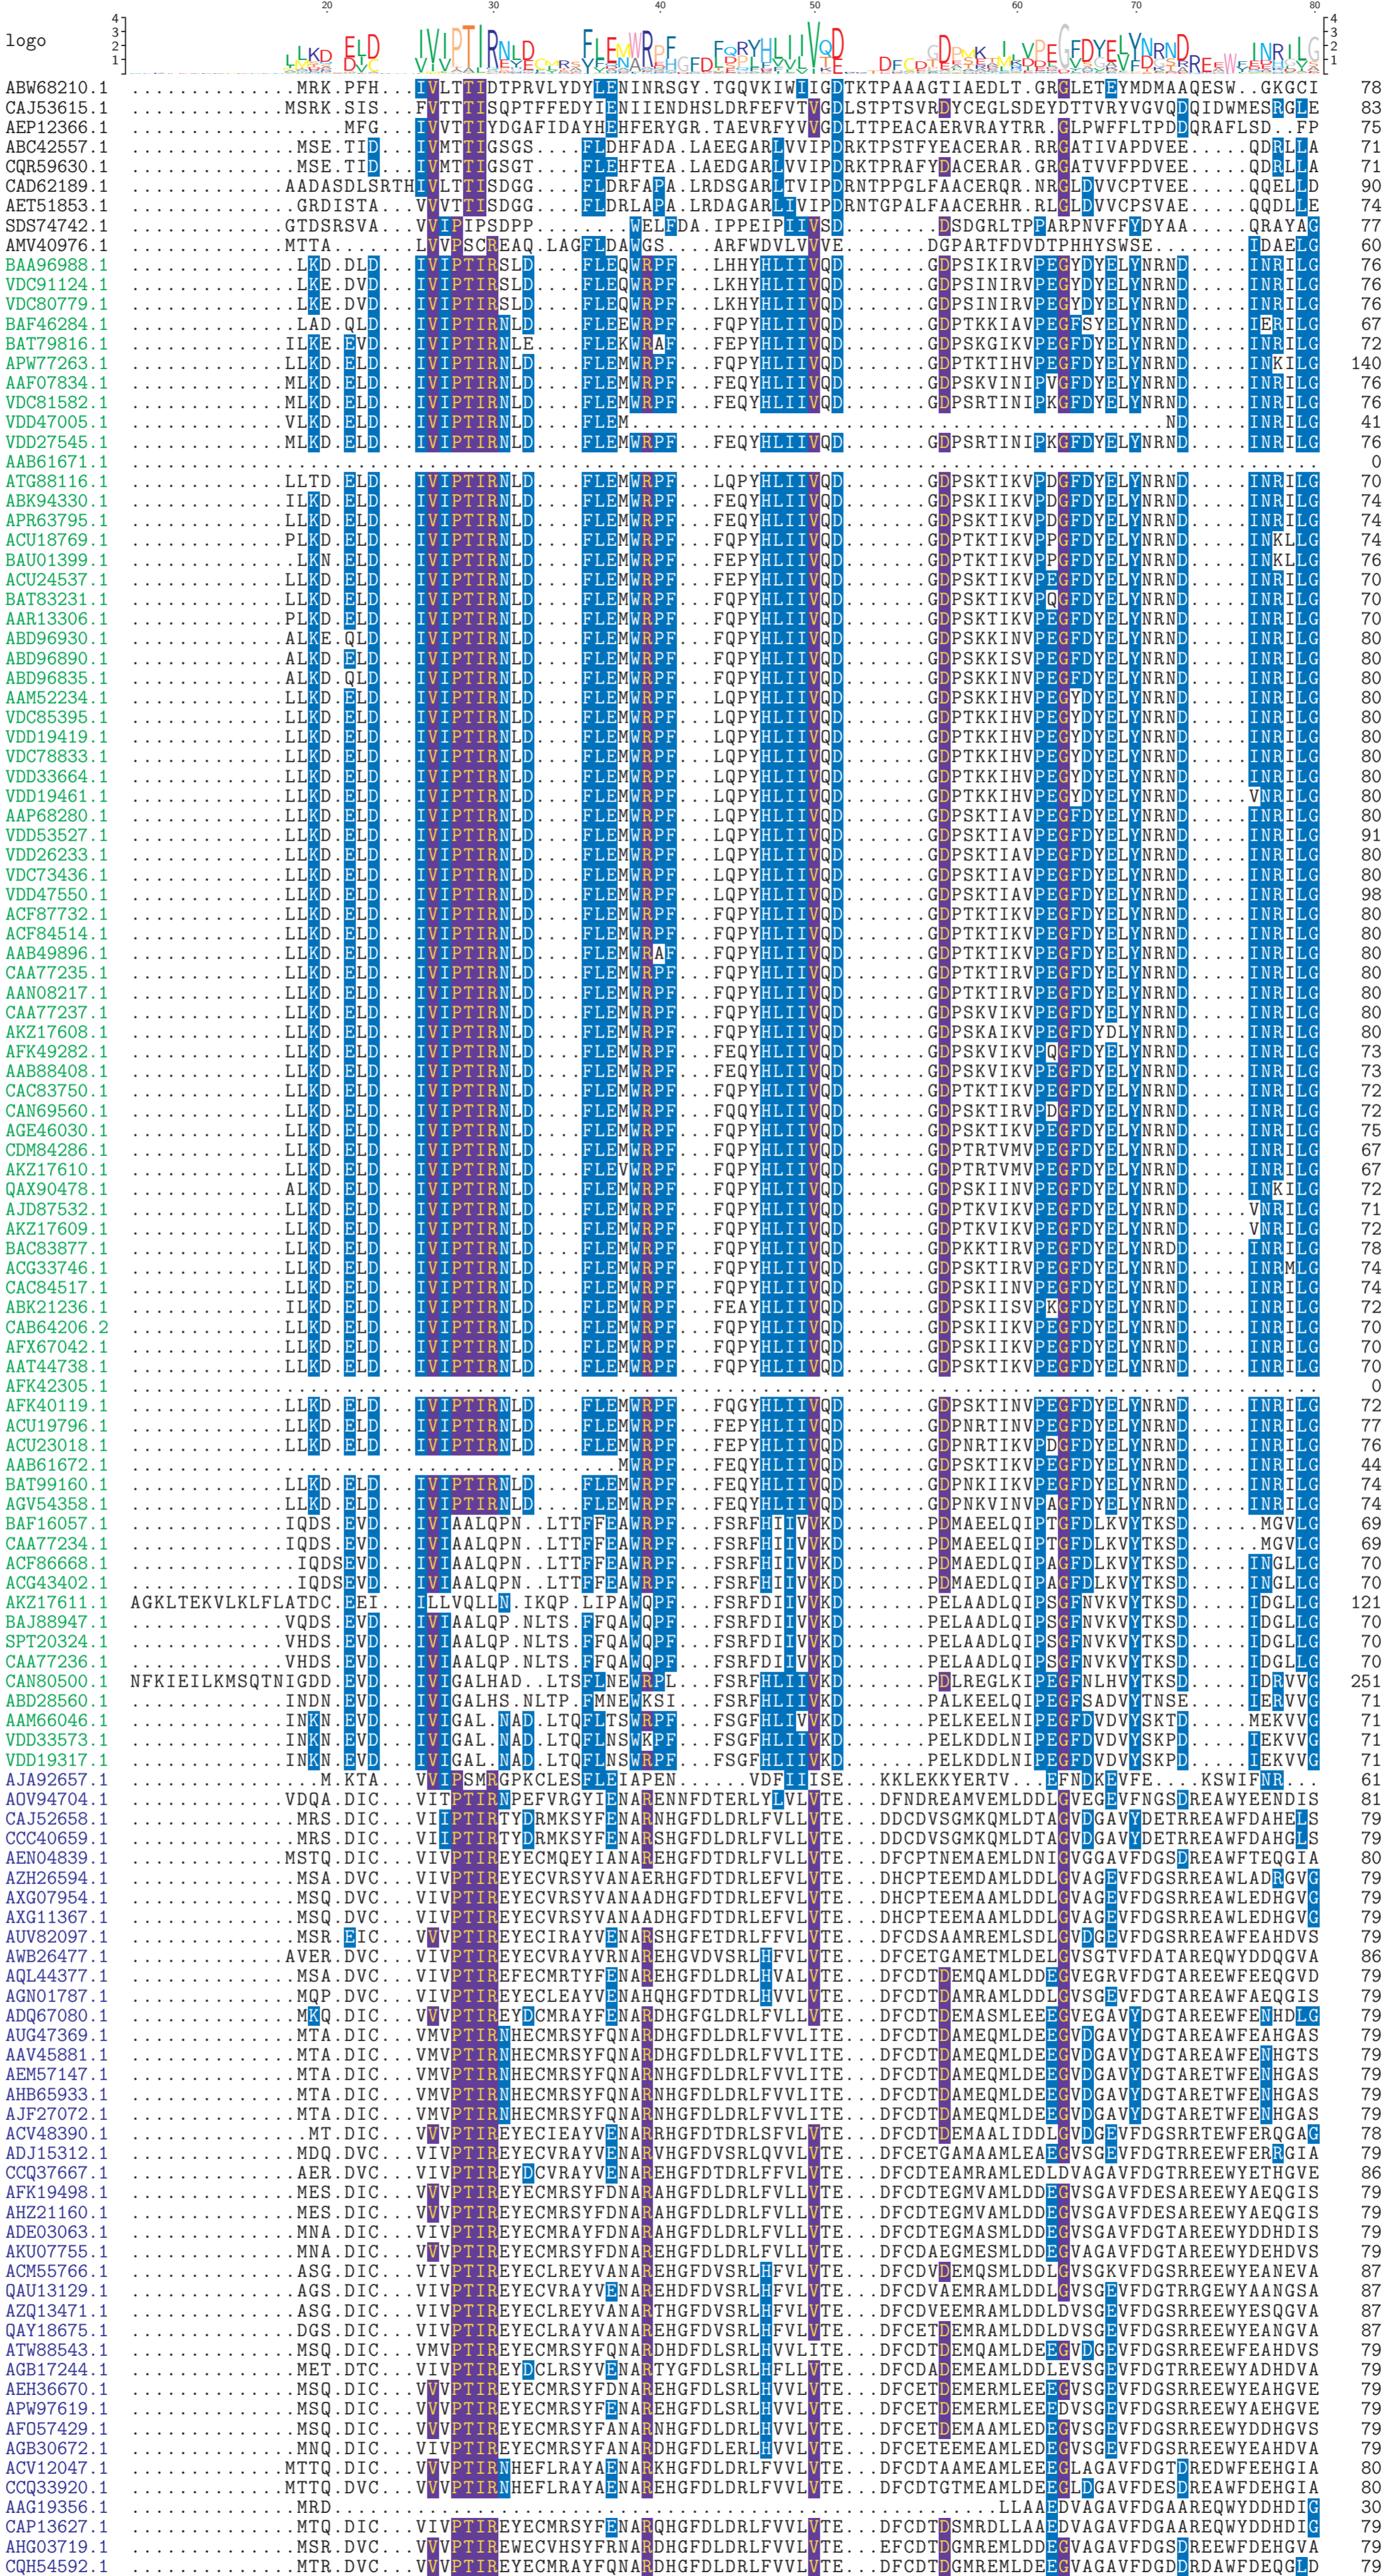



The DrD motif

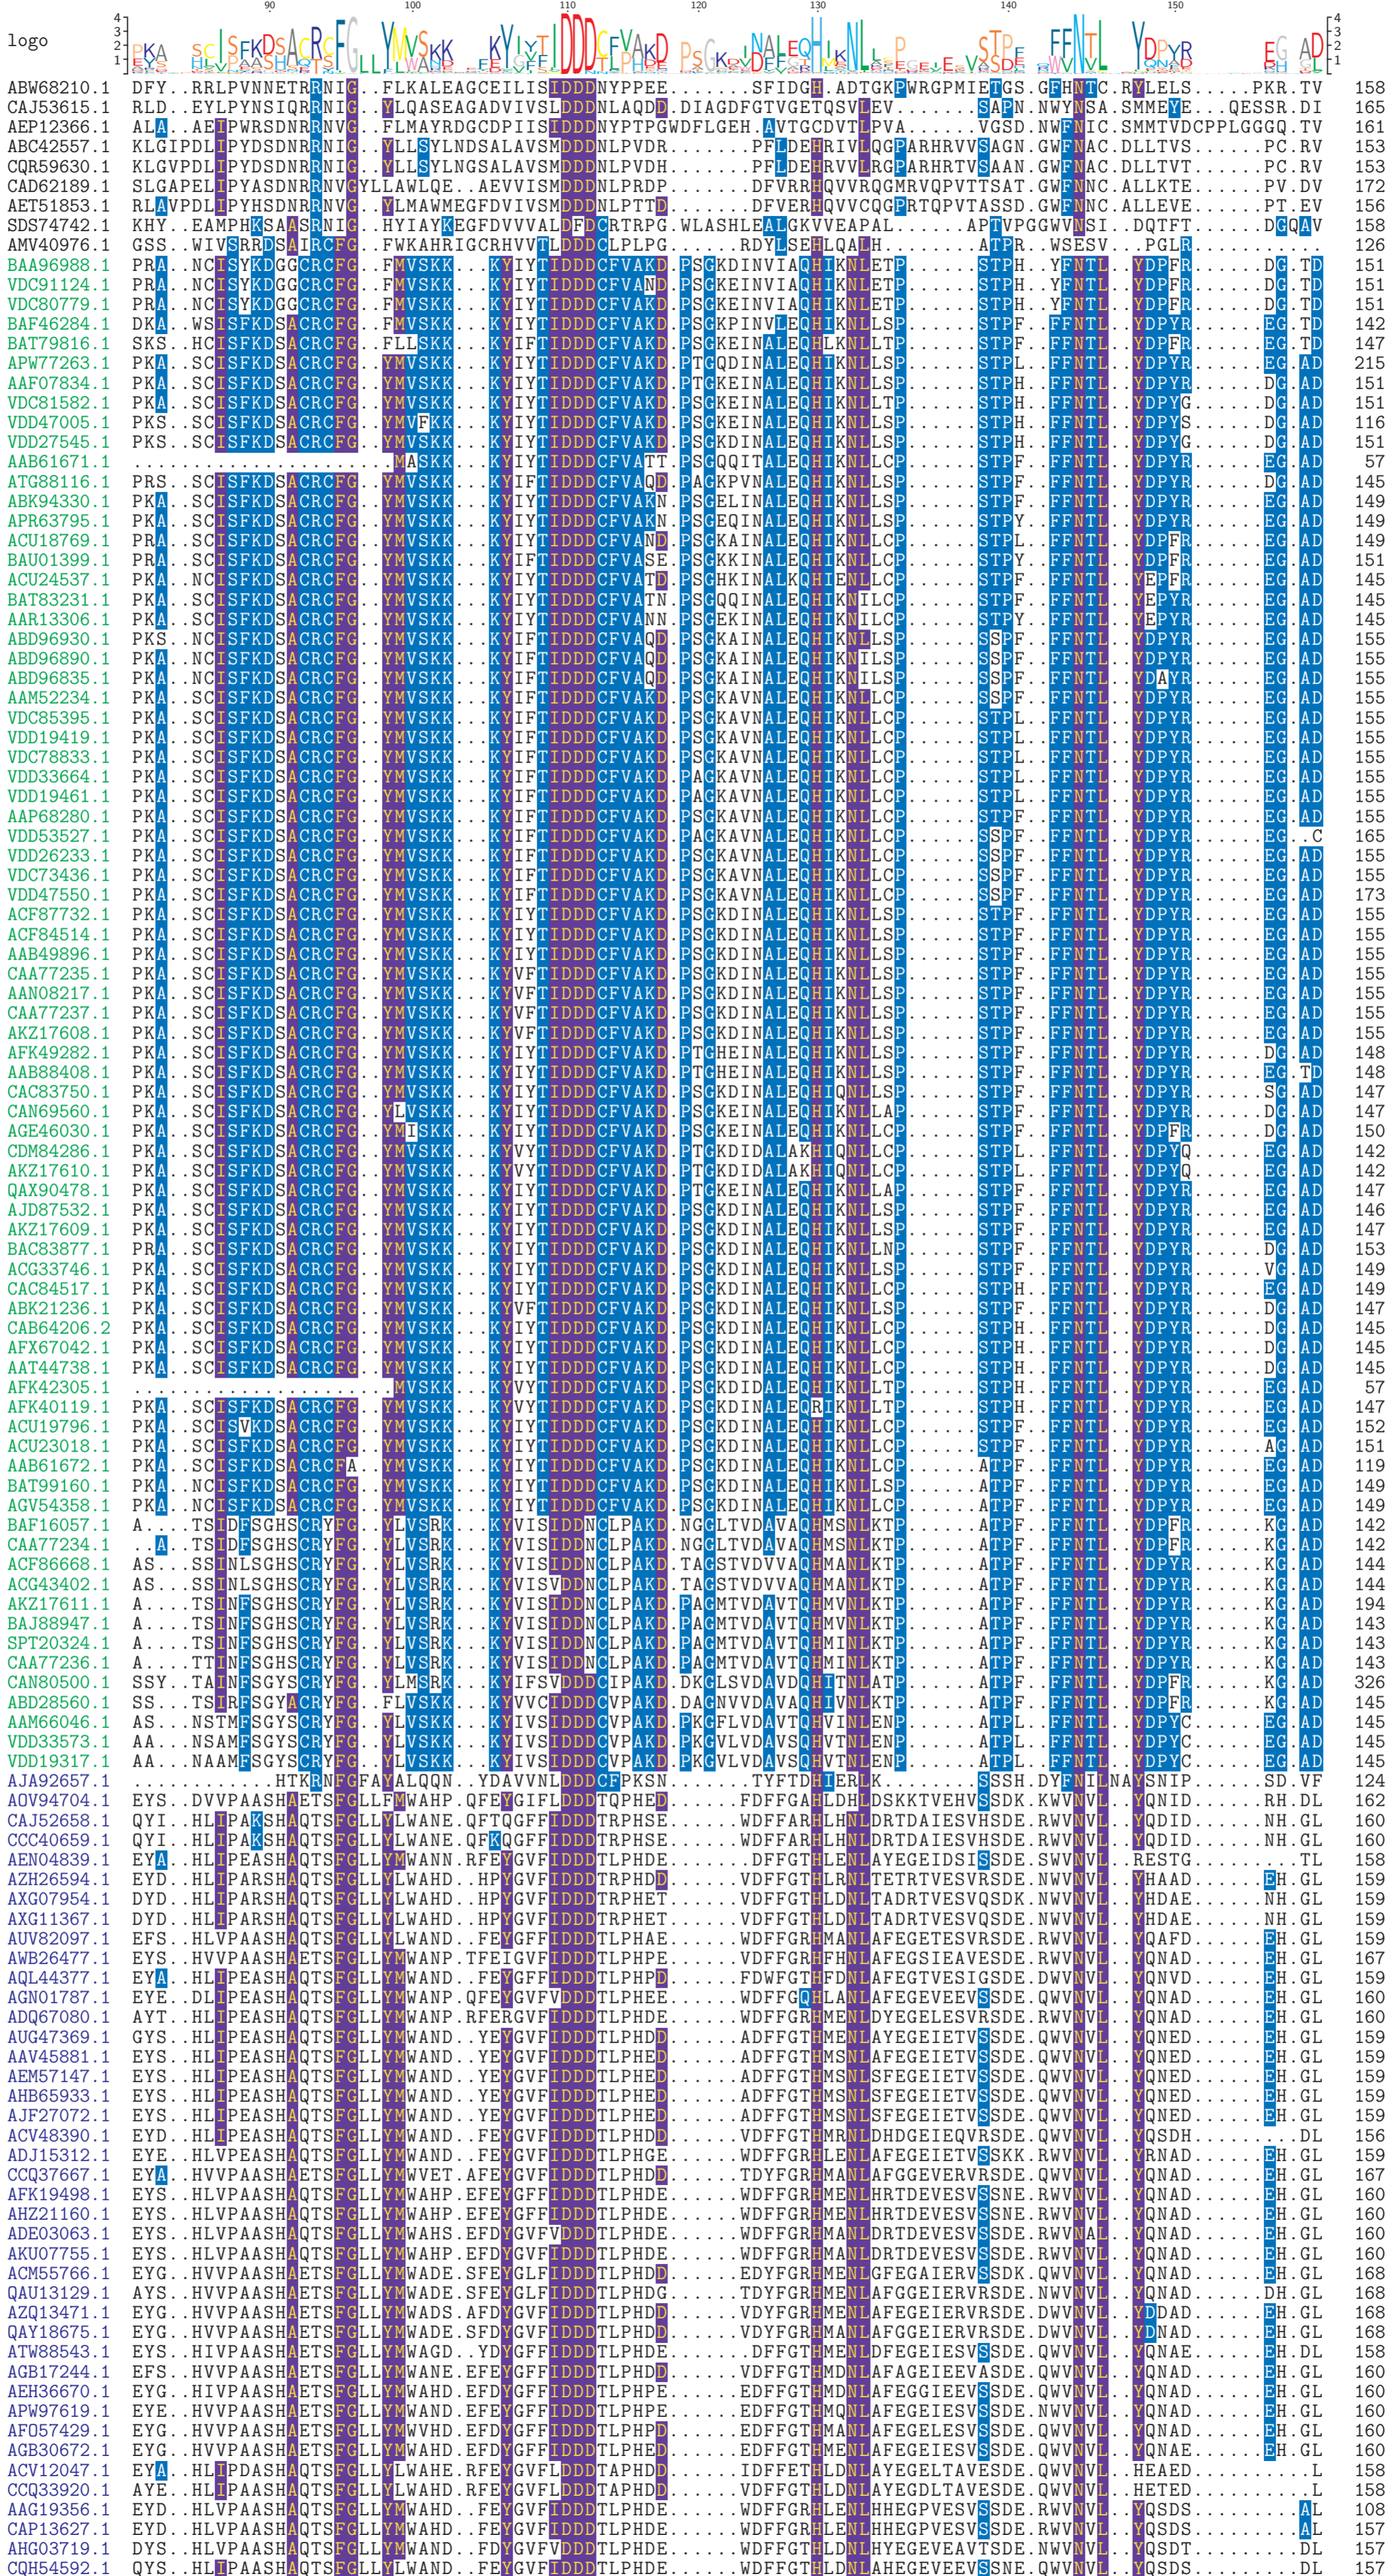



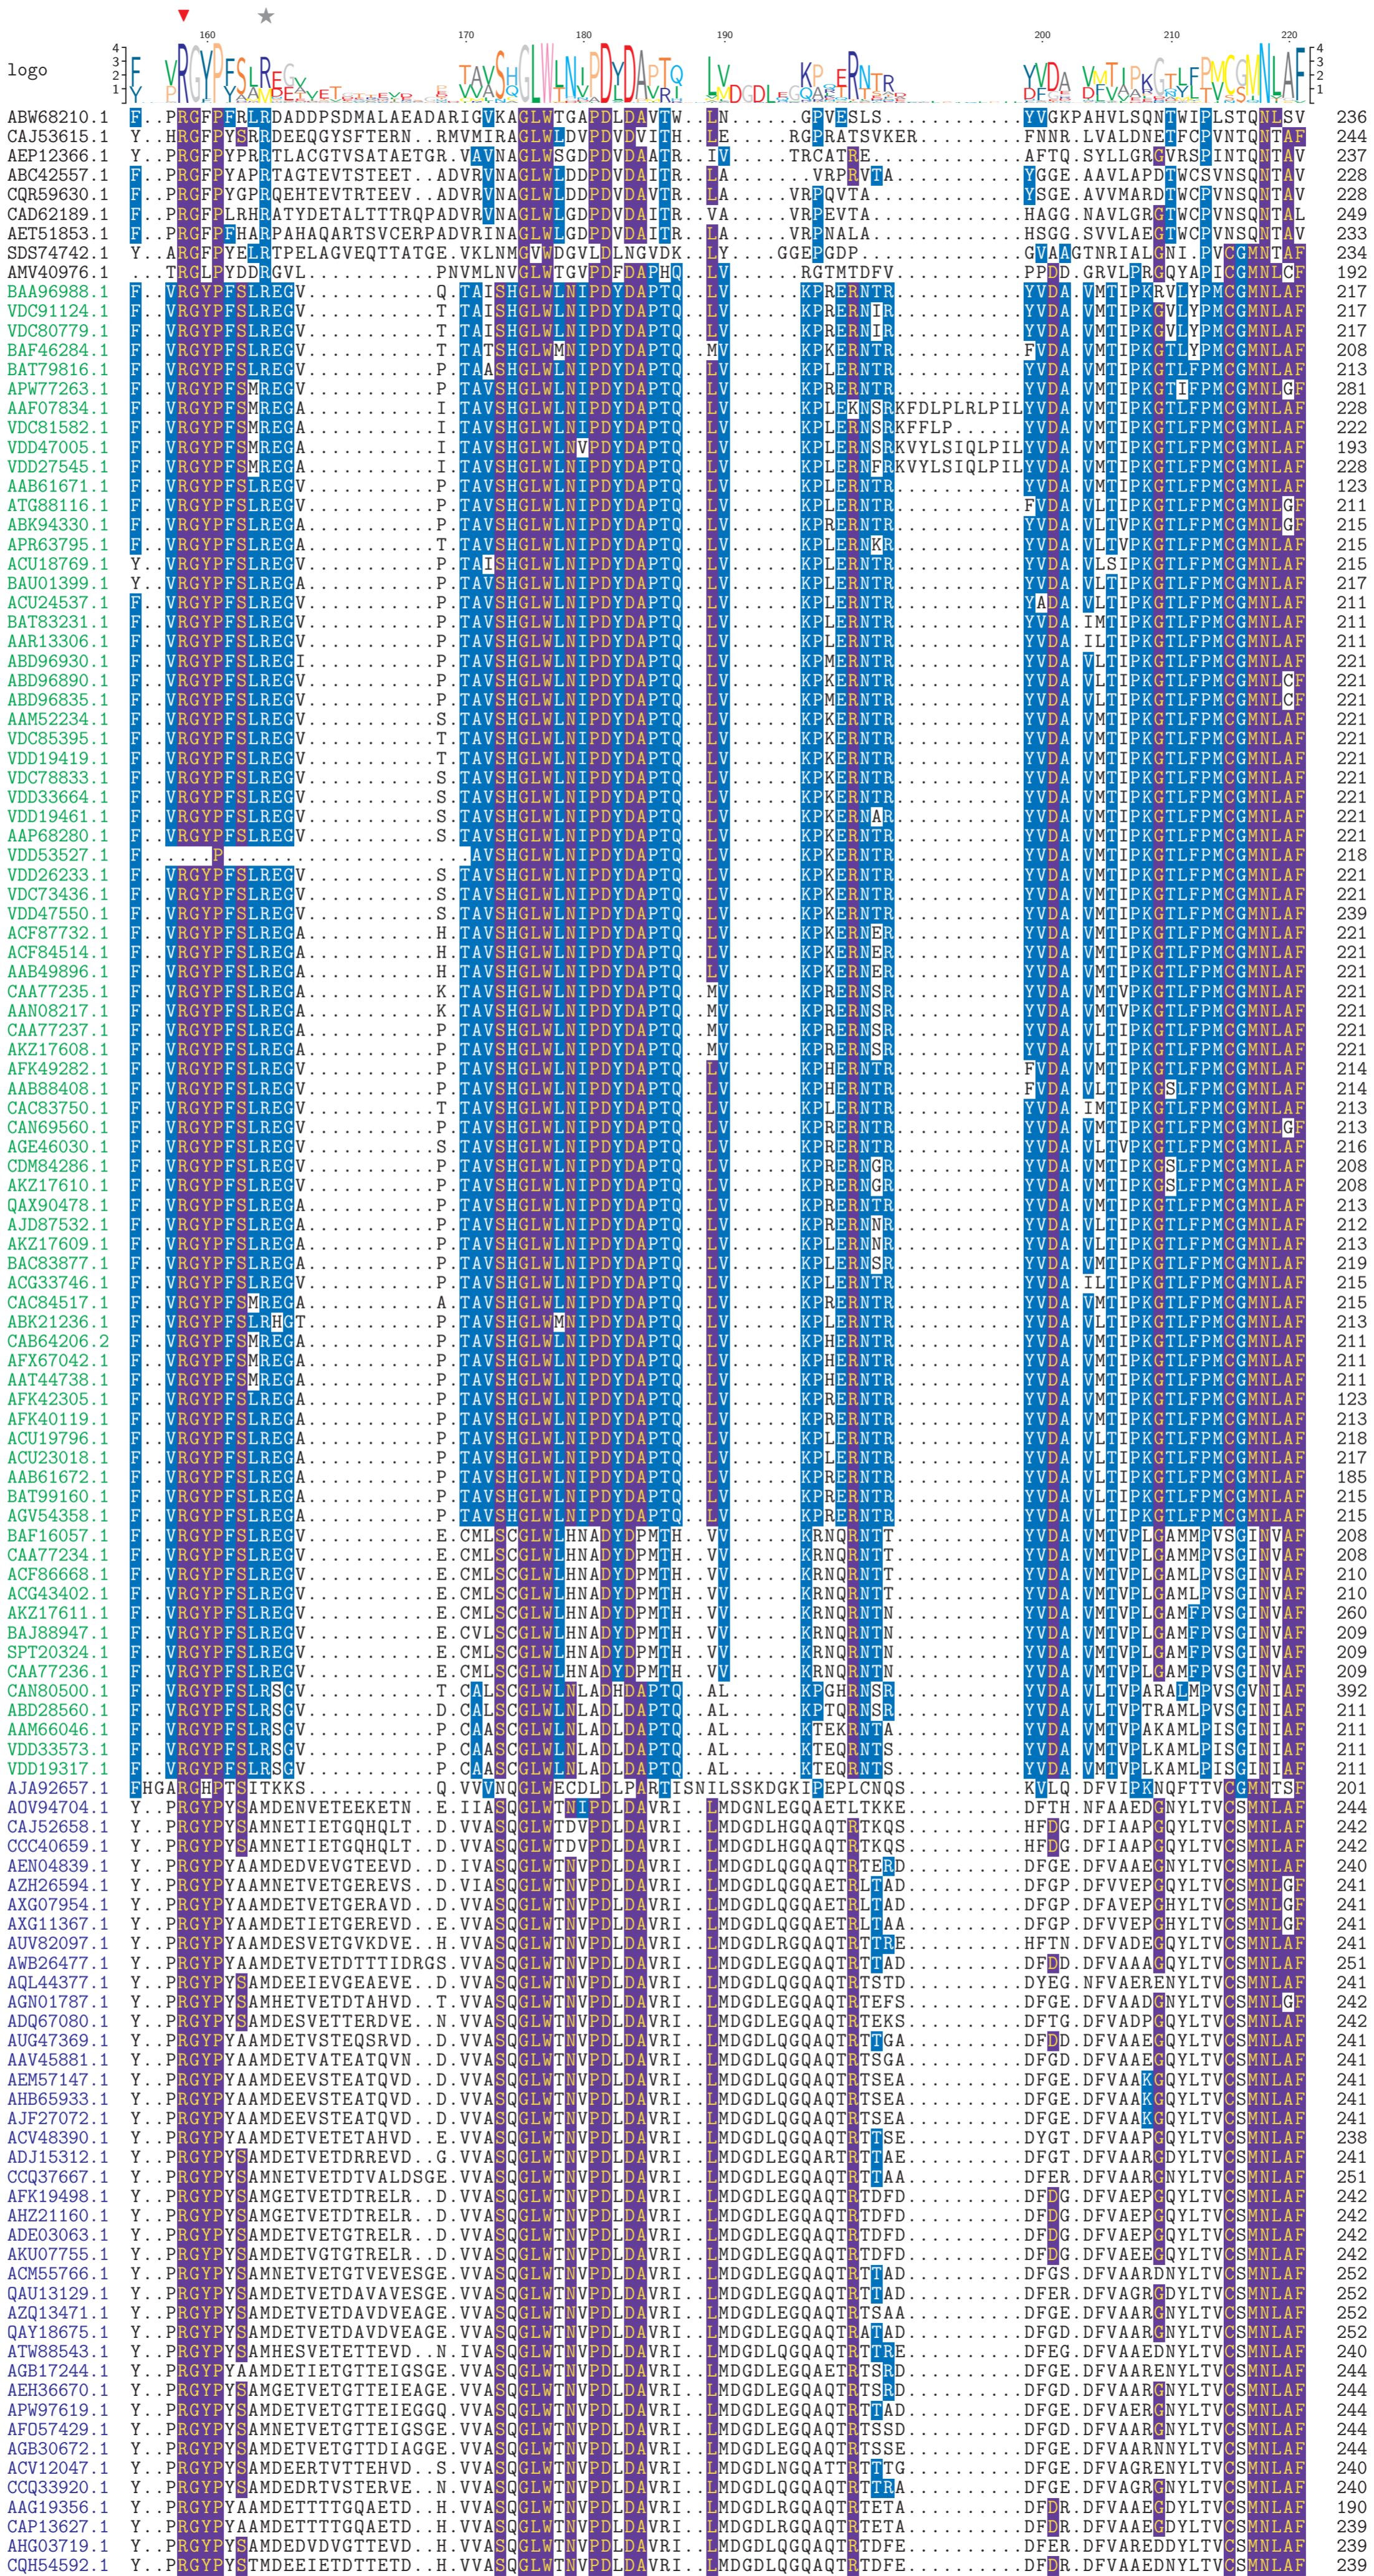



|            | 230   | 240      | 250       | 260    | 270  | 280  | 290     | 300     |        |            |       |      |       |       |       |       |      |        |        |      |     |     |     |
|------------|-------|----------|-----------|--------|------|------|---------|---------|--------|------------|-------|------|-------|-------|-------|-------|------|--------|--------|------|-----|-----|-----|
| ABW68210.1 | CNLI  | PAICLCVP | MGHMPGRLE | RYG    | DVWG | GYFL | QALIRGT | CYHAAF  | CHPTL  | SRNPHDALAD | RREY  | WML  | LTD   | LDL   | LRLHR | ...   | 321  |        |        |      |     |     |     |
| CAJ53615.1 | HTDLM | PLIHTIP  | MGDEVE    | GMEIS  | SRFD | DIWL | GFFA    | EKILQEM | GTVA   | YSPVSI     | HDRNR | HLN  | LRN   | RE    | HEAT  | GLRLN | VI   | DILEDI | ...    | 329  |     |     |     |
| AEP12366.1 | MMAAL | PAYYVVK  | MGVSLA    | GKLKLD | HFG  | DIFS | GYFV    | QLCAEAV | GHRVR  | VSVE       | HRRT  | PHN  | LY    | VD    | WHL   | BLAG  | MMV  | LDML   | PLETTP | ...  | 322 |     |     |
| ABC42557.1 | HHDAL | PAYYFLR  | MQSIG     | GAPVER | HFG  | DIFS | GYFV    | AACAKHL | GHAVER | GPLV       | NHQR  | NDH  | LDL   | DD    | AI    | BLPA  | IRF  | MD     | ELLAWL | REF  | ... | 313 |     |
| CQR59630.1 | HHDAL | PAYYFLR  | MQPIG     | GAVER  | HFG  | DIFS | GYFV    | AACAKHL | GHAVER | GPLV       | NHQR  | NEH  | DL    | LD    | VI    | ELPA  | IRF  | MD     | ELLAWL | REF  | ... | 313 |     |
| CAD62189.1 | HHDAL | PAYYFLR  | MQQRV     | GVVER  | HFG  | DIFS | GYFL    | QACAQHL | GHAVER | GPLV       | DHPR  | NEH  | DL    | LD    | TK    | ELPA  | IRF  | MD     | ELLAWL | REF  | ... | 334 |     |
| AET51853.1 | HHDAL | PAYYFLR  | MQPVD     | GVVER  | HFG  | DIFS | GYFV    | QVCAQHL | GHAVER | GPLV       | VEH   | PRNE | H     | DL    | DK    | ELPA  | IRF  | MD     | ELLAWL | REF  | ... | 318 |     |
| SDS74742.1 | AAELT | PAYYFLPD | VWVN      | GWQLS  | RHD  | DIWG | GYVVA   | KKLMDLR | GLDFA  | GAPV       | VEHT  | NQ   | TRLER | V     | VLE   | QW    | MHL  | MSV    | PFYEL  | VDEA | ... | 317 |     |
| AMV40976.1 | RREFA | PLAYFPL  | QCE       | GWYRR  | RFD  | DIWF | GVIA    | QKACDHL | GQITM  | GRV        | WRH   | AR   | ASDV  | Y     | QN    | V     | KEAP | IG     | FN     | ER   | FRV | ... | 273 |
| BAA96988.1 | NREL  | GPAMYFGL | MGE       | GQPI   | SRD  | DMWA | GWAA    | KVICDHL | GFGV   | KTGL       | PL    | IW   | HS    | KASNP | FVNL  | KK    | KEYK | GLH    | WQ     | DM   | V   | ... | 299 |
| VDC91124.1 | NREL  | GPAMYFGL | MGE       | GQPI   | SRD  | DMWA | GWAA    | KVICDHL | GFGV   | KTGL       | PL    | IW   | HS    | KASNP | FVNL  | KK    | KEYK | GLH    | WQ     | DM   | V   | ... | 299 |
| VDC80779.1 | NREL  | GPAMYFGL | MGE       | GQPI   | SRD  | DMWA | GWAA    | KVICDHL | GFGV   | KTGL       | PL    | IW   | HS    | KASNP | FVNL  | KK    | KEYK | GLH    | WQ     | DM   | V   | ... | 299 |
| BAF46284.1 | DREL  | IGAMYFGL | MGE       | GQPI   | GRYD | DMWA | GWCT    | KVICDHL | GFGV   | KTGL       | PL    | IW   | HS    | KASNP | FVNL  | KK    | KEYK | GLH    | WQ     | DM   | V   | ... | 290 |
| BAT79816.1 | NREL  | IGAMYFGL | MGE       | GQPI   | GRYD | DMWA | GWCM    | KVICDHL | GFGV   | KTGL       | PL    | IW   | HS    | KASNP | FVNL  | KK    | KEYK | GLH    | WQ     | DM   | V   | ... | 295 |
| APW77263.1 | NREL  | IGAMYFGL | MGE       | GQPI   | GRYD | DMWA | GWCT    | KVICDHL | GFGV   | KTGL       | PL    | IW   | HS    | KASNP | FVNL  | KK    | KEYK | GLH    | WQ     | DM   | V   | ... | 363 |
| AAF07834.1 | DREL  | IGAMYFGL | MGE       | GQPI   | GRYD | DMWA | GWCV    | KVICDHL | GFGV   | KTGL       | PL    | IW   | HS    | KASNP | FVNL  | KK    | KEYK | GLH    | WQ     | DM   | V   | ... | 310 |
| VDC81582.1 | DREL  | IGAMYFGL | MGE       | GQPI   | GRYD | DMWA | GWCV    | KVICDHL | GFGV   | KTGL       | PL    | IW   | HS    | KASNP | FVNL  | KK    | KEYK | GLH    | WQ     | DM   | V   | ... | 304 |
| VDD47005.1 | DREL  | IGAMYFGL | MGE       | GQPI   | GRYD | DMWA | GWCV    | KVICDHL | GFGV   | KTGL       | PL    | IW   | HS    | KASNP | FVNL  | KK    | KEYK | GLH    | WQ     | DM   | V   | ... | 275 |
| VDD27545.1 | DREL  | IGAMYFGL | MGE       | GQPI   | GRYD | DMWA | GWCV    | KVICDHL | GFGV   | KTGL       | PL    | IW   | HS    | KASNP | FVNL  | KK    | KEYK | GLH    | WQ     | DM   | V   | ... | 310 |
| AAB61671.1 | DREL  | IGAMYFGL | MGE       | GQPI   | GRYD | DMWA | GWCC    | KVICDHL | GFGV   | KTGL       | PL    | IW   | HS    | KASNP | FVNL  | KK    | KEYK | GLH    | WQ     | DM   | V   | ... | 205 |
| ATG88116.1 | DREL  | IGAMYFGL | MGE       | GQPI   | GRYD | DMWA | GWCI    | KVICDHL | GFGV   | KTGL       | PL    | IW   | HS    | KASNP | FVNL  | KK    | KEYK | GLH    | WQ     | DM   | V   | ... | 293 |
| ABK94330.1 | NREL  | IGAMYFGL | MGE       | GQPI   | GRYD | DMWA | GWCM    | KVICDHL | GFGV   | KTGL       | PL    | IW   | HS    | KASNP | FVNL  | KK    | KEYK | GLH    | WQ     | DM   | V   | ... | 297 |
| APR63795.1 | NREL  | IGAMYFGL | MGE       | GQPI   | GRYD | DMWA | GWCM    | KVICDHL | GFGV   | KTGL       | PL    | IW   | HS    | KASNP | FVNL  | KK    | KEYK | GLH    | WQ     | DM   | V   | ... | 297 |
| ACU18769.1 | DREL  | IGAMYFGL | MGE       | GQPI   | GRYD | DMWA | GWCC    | KVICDHL | GFGV   | KTGL       | PL    | IW   | HS    | KASNP | FVNL  | KK    | KEYK | GLH    | WQ     | DM   | V   | ... | 297 |
| BAU01399.1 | DREL  | IGAMYFGL | MGE       | GQPI   | GRYD | DMWA | GWCC    | KVICDHL | GFGV   | KTGL       | PL    | IW   | HS    | KASNP | FVNL  | KK    | KEYK | GLH    | WQ     | DM   | V   | ... | 299 |
| ACU24537.1 | DREL  | IGAMYFGL | MGE       | GQPI   | GRYD | DMWA | GWCC    | KVICDHL | GFGV   | KTGL       | PL    | IW   | HS    | KASNP | FVNL  | KK    | KEYK | GLH    | WQ     | DM   | V   | ... | 293 |
| BAT83231.1 | DREL  | IGAMYFGL | MGE       | GQPI   | GRYD | DMWA | GWCC    | KVICDHL | GFGV   | KTGL       | PL    | IW   | HS    | KASNP | FVNL  | KK    | KEYK | GLH    | WQ     | DM   | V   | ... | 293 |
| AAR13306.1 | DREL  | IGAMYFGL | MGE       | GQPI   | GRYD | DMWA | GWCC    | KVICDHL | GFGV   | KTGL       | PL    | IW   | HS    | KASNP | FVNL  | KK    | KEYK | GLH    | WQ     | DM   | V   | ... | 293 |
| ABD96930.1 | DREL  | IGAMYFGL | MGE       | GQPI   | GRYD | DMWA | GWCV    | KVICDHL | GFGV   | KTGL       | PL    | IW   | HS    | KASNP | FVNL  | KK    | KEYK | GLH    | WQ     | DM   | V   | ... | 303 |
| ABD96890.1 | DREL  | IGAMYFGL | MGE       | GQPI   | GRYD | DMWA | GWCV    | KVICDHL | GFGV   | KTGL       | PL    | IW   | HS    | KASNP | FVNL  | KK    | KEYK | GLH    | WQ     | DM   | V   | ... | 303 |
| ABD96835.1 | DREL  | IGAMYFGL | MGE       | GQPI   | GRYD | DMWA | GWCV    | KVICDHL | GFGV   | KTGL       | PL    | IW   | HS    | KASNP | FVNL  | KK    | KEYK | GLH    | WQ     | DM   | V   | ... | 303 |
| AAM52234.1 | DREL  | IGAMYFGL | MGE       | GQPI   | GRYD | DMWA | GWCI    | KVICDHL | GFGV   | KTGL       | PL    | IW   | HS    | KASNP | FVNL  | KK    | KEYK | GLH    | WQ     | DM   | V   | ... | 303 |
| VDC85395.1 | DREL  | IGAMYFGL | MGE       | GQPI   | GRYD | DMWA | GWCI    | KVICDHL | GFGV   | KTGL       | PL    | IW   | HS    | KASNP | FVNL  | KK    | KEYK | GLH    | WQ     | DM   | V   | ... | 303 |
| VDD19419.1 | DREL  | IGAMYFGL | MGE       | GQPI   | GRYD | DMWA | GWCI    | KVICDHL | GFGV   | KTGL       | PL    | IW   | HS    | KASNP | FVNL  | KK    | KEYK | GLH    | WQ     | DM   | V   | ... | 303 |
| VDC78833.1 | DREL  | IGAMYFGL | MGE       | GQPI   | GRYD | DMWA | GWCI    | KVICDHL | GFGV   | KTGL       | PL    | IW   | HS    | KASNP | FVNL  | KK    | KEYK | GLH    | WQ     | DM   | V   | ... | 303 |
| VDD33664.1 | DREL  | IGAMYFGL | MGE       | GQPI   | GRYD | DMWA | GWCI    | KVICDHL | GFGV   | KTGL       | PL    | IW   | HS    | KASNP | FVNL  | KK    | KEYK | GLH    | WQ     | DM   | V   | ... | 303 |
| VDD19461.1 | DREL  | IGAMYFGL | MGE       | GQPI   | GRYD | DMWA | GWCI    | KVICDHL | GFGV   | KTGL       | PL    | IW   | HS    | KASNP | FVNL  | KK    | KEYK | GLH    | WQ     | DM   | V   | ... | 303 |
| AAP68280.1 | DREL  | IGAMYFGL | MGE       | GQPI   | GRYD | DMWA | GWCI    | KVICDHL | GFGV   | KTGL       | PL    | IW   | HS    | KASNP | FVNL  | KK    | KEYK | GLH    | WQ     | DM   | V   | ... | 303 |
| VDD53527.1 | DREL  | IGAMYFGL | MGE       | GQPI   | GRYD | DMWA | GWCV    | KVICDHL | GFGV   | KTGL       | PL    | IW   | HS    | KASNP | FVNL  | KK    | KEYK | GLH    | WQ     | DM   | V   | ... | 300 |
| VDD26233.1 | DREL  | IGAMYFGL | MGE       | GQPI   | GRYD | DMWA | GWCV    | KVICDHL | GFGV   | KTGL       | PL    | IW   | HS    | KASNP | FVNL  | KK    | KEYK | GLH    | WQ     | DM   | V   | ... | 303 |
| VDC73436.1 | DREL  | IGAMYFGL | MGE       | GQPI   | GRYD | DMWA | GWCV    | KVICDHL | GFGV   | KTGL       | PL    | IW   | HS    | KASNP | FVNL  | KK    | KEYK | GLH    | WQ     | DM   | V   | ... | 303 |
| VDD47550.1 | DREL  | IGAMYFGL | MGE       | GQPI   | GRYD | DMWA | GWCV    | KVICDHL | GFGV   | KTGL       | PL    | IW   | HS    | KASNP | FVNL  | KK    | KEYK | GLH    | WQ     | DM   | V   | ... | 321 |
| ACF87732.1 | DREL  | IGAMYFGL | MGE       | GQPI   | GRYD | DMWA | GWCV    | KVICDHL | GFGV   | KTGL       | PL    | IW   | HS    | KASNP | FVNL  | KK    | KEYK | GLH    | WQ     | DM   | V   | ... | 303 |
| ACF84514.1 | DREL  | IGAMYFGL | MGE       | GQPI   | GRYD | DMWA | GWCV    | KVICDHL | GFGV   | KTGL       | PL    | IW   | HS    | KASNP | FVNL  | KK    | KEYK | GLH    | WQ     | DM   | V   | ... | 303 |
| AAB49896.1 | DREL  | IGAMYFGL | MGE       | GQPI   | GRYD | DMWA | GWCV    | KVICDHL | GFGV   | KTGL       | PL    | IW   | HS    | KASNP | FVNL  | KK    | KEYK | GLH    | WQ     | DM   | V   | ... | 303 |
| CAAT7235.1 | DREL  | IGAMYFGL | MGE       | GQPI   | GRYD | DMWA | GWCM    | KVICDHL | GFGV   | KTGL       | PL    | IW   | HS    | KASNP | FVNL  | KK    | KEYK | GLH    | WQ     | DM   | V   | ... | 303 |
| AAN08217.1 | DREL  | IGAMYFGL | MGE       | GQPI   | GRYD | DMWA | GWCM    | KVICDHL | GFGV   | KTGL       | PL    | IW   | HS    | KASNP | FVNL  | KK    | KEYK | GLH    | WQ     | DM   | V   | ... | 303 |
| CAAT7237.1 | DREL  | IGAMYFGL | MGE       | GQPI   | GRYD | DMWA | GWCV    | KVICDHL | GFGV   | KTGL       | PL    | IW   | HS    | KASNP | FVNL  | KK    | KEYK | GLH    | WQ     | DM   | V   | ... | 303 |
| AKZ17608.1 | DREL  | IGAMYFGL | MGE       | GQPI   | GRYD | DMWA | GWCV    | KVICDHL | GFGV   | KTGL       | PL    | IW   | HS    | KASNP | FVNL  | KK    | KEYK | GLH    | WQ     | DM   | V   | ... | 303 |
| AFK49282.1 | DREL  | IGAMYFGL | MGE       | GQPI   | GRYD | DMWA | GWCI    | KVICDHL | GFGV   | KTGL       | PL    | IW   | HS    | KASNP | FVNL  | KK    | KEYK | GLH    | WQ     | DM   | V   | ... | 296 |
| AAB88408.1 | NREL  | IGAMYFGL | MGE       | GQPI   | GRYD | DMWA | GWCI    | KVICDHL | GFGV   | KTGL       | PL    | IW   | HS    | KASNP | FVNL  | KK    | KEYK | GLH    | WQ     | DM   | V   | ... | 296 |
| CAC83750.1 | NREL  | IGAMYFGL | MGE       | GQPI   | GRYD | DMWA | GWCT    | KVICDHL | GFGV   | KTGL       | PL    | IW   | HS    | KASNP | FVNL  | KK    | KEYK | GLH    | WQ     | DM   | V   | ... | 295 |
| CAN69560.1 | NREL  | IGAMYFGL | MGE       | GQPI   | GRYD | DMWA | GWCT    | KVICDHL | GFGV   | KTGL       | PL    | IW   | HS    | KASNP | FVNL  | KK    | KEYK | GLH    | WQ     | DM   | V   | ... | 295 |
| AGE46030.1 | DREL  | IGAMYFGL | MGE       | GQPI   | GRYD | DMWA | GWCT    | KVICDHL | GFGV   | KTGL       | PL    | IW   | HS    | KASNP | FVNL  | KK    | KEYK | GLH    | WQ     | DM   | V   | ... | 298 |
| CDM84286.1 | DREL  | IGAMYFGL | MGE       | GQPI   | GRYD | DMWA | GWCV    | KVICDHL | GFGV   | KTGL       | PL    | IW   | HS    | KASNP | FVNL  | KK    | KEYK | GLH    | WQ     | DM   | V   | ... | 290 |
| AKZ17610.1 | DREL  | IGAMYFGL | MGE       | GQPI   | GRYD | DMWA | GWCV    | KVICDHL | GFGV   | KTGL       | PL    | IW   | HS    | KASNP | FVNL  | KK    | KEYK | GLH    | WQ     | DM   | V   | ... | 290 |
| QAX90478.1 | DREL  | IGAMYFGL | MGE       | GQPI   | GRYD | DMWA | GWCT    | KVICDHL | GFGV   | KTGL       | PL    | IW   | HS    | KASNP | FVNL  | KK    | KEYK | GLH    | WQ     | DM   | V   | ... | 295 |
| AJD87532.1 | DREL  | IGAMYFGL | MGE       | GQPI   | GRYD | DMWA | GWCT    | KVICDHL | GFGV   | KTGL       | PL    | IW   | HS    | KASNP | FVNL  | KK    | KEYK | GLH    | WQ     | DM   | V   | ... | 294 |
| AKZ17609.1 | DREL  | IGAMYFGL | MGE       | GQPI   | GRYD | DMWA | GWCT    | KVICDHL | GFGV   | KTGL       | PL    | IW   | HS    | KASNP | FVNL  | KK    | KEYK | GLH    | WQ     | DM   | V   | ... | 295 |
| BAC83877.1 | DREL  | IGAMYFGL | MGE       | GQPI   | GRYD | DMWA | GWCT    | KVICDHL | GFGV   | KTGL       | PL    | IW   | HS    | KASNP | FVNL  | KK    | KEYK | GLH    | WQ     | DM   | V   | ... | 301 |
| ACG33746.1 | DREL  | IGAMYFGL | MGE       | GQPI   | GRYD | DMWA | GWCT    | KVICDHL | GFGV   | KTGL       | PL    | IW   | HS    | KASNP | FVNL  | KK    | KEYK | GLH    | WQ     | DM   | V   | ... | 297 |
| CAC84517.1 | DREL  | IGAMYFGL | MGE       | GQPI   | GRYD | DMWA | GWCI    | KVICDHL | GFGV   | KTGL       | PL    | IW   | HS    | KASNP | FVNL  | KK    | KEYK | GLH    | WQ     | DM   | V   | ... | 297 |
| ABK21236.1 | DREL  | IGAMYFGL | MGE       | GQPI   | GRYD | DMWA | GWCI    | KVICDHL | GFGV   | KTGL       | PL    | IW   | HS    | KASNP | FVNL  | KK    | KEYK | GLH    | WQ     | DM   | V   | ... | 295 |
| CAB64206.2 | DREL  | IGAMYFGL | MGE       | GQPI   | GRYD | DMWA | GWCT    | KVICDHL | GFGV   | KTGL       | PL    | IW   | HS    | KASNP | FVNL  | KK    | KEYK | GLH    | WQ     | DM   | V   | ... | 293 |
| AFX67042.1 | DREL  | IGAMYFGL | MGE       | GQPI   | GRYD | DMWA | GWCT    | KVICDHL | GFGV   | KTGL       | PL    | IW   | HS    | KASNP | FVNL  | KK    | KEYK | GLH    | WQ     | DM   | V   | ... | 293 |
| AAT44738.1 | DREL  | IGAMYFGL | MGE       | GQPI   | GRYD | DMWA | GWCT    | KVICDHL | GFGV   | KTGL       | PL    | IW   | HS    | KASNP | FVNL  | KK    | KEYK | GLH    | WQ     | DM   | V   | ... | 293 |
| AFK42305.1 | DREL  | IGAMYFGL | MGE       | GQPI   | GRYD | DMWA | GWCI    | KVICDHL | GFGV   | KTGL       | PL    | IW   | HS    | KASNP | FVNL  | KK    | KEYK | GLH    | WQ     | DM   | V   | ... | 205 |
| AFK40119.1 | DREL  | IGAMYFGL | MGE       | GQPI   | GRYD | DMWA | GWCI    | KVICDHL | GFGV   | KTGL       | PL    | IW   | HS    | KASNP | FVNL  | KK    | KEYK | GLH    | WQ     | DM   | V   | ... | 295 |
| ACU19796.1 | DREL  | IGAMYFGL | MGE       | GQPI   | GRYD | DMWA | GWCV    | KVICDHL | GFGV   | KTGL       | PL    | IW   | HS    | KASNP | FVNL  | KK    | KEYK | GLH    | WQ     | DM   | V   | ... | 300 |
| ACU23018.1 | DREL  | IGAMYFGL | MGE       | GQPI   | GRYD | DMWA | GWCV    | KVICDHL | GFGV   | KTGL       | PL    | IW   | HS    | KASNP | FVNL  | KK    | KEYK | GLH    | WQ     | DM   | V   | ... | 299 |
| AAB61672.1 | DREL  | IGAMYFGL | MGE       | GQPI   | GRYD | DMWA | GWCV    | KVICDHL | GFGV   | KTGL       | PL    | IW   | HS    | KASNP | FVNL  | KK    | KEYK | GLH    | WQ     | DM   | V   | ... | 267 |
| BAT99160.1 | DREL  | IGAMYFGL | MGE       | GQPI   | GRYD | DMWA | GWCV    | KVICDHL | GFGV</ |            |       |      |       |       |       |       |      |        |        |      |     |     |     |



| Logo       | 310       | 320               | 330                           | 340                  |                     |     |
|------------|-----------|-------------------|-------------------------------|----------------------|---------------------|-----|
| ABW68210.1 | .FAPSA    | .PAMTDRTRE        | .GDFLRDEATLVDPWCPPEVGFMAITG   | .ENLRLWAD            | 372                 |     |
| CAJ53615.1 | .KISG     | .STYPECYRDI       | .IEKFRQ...QVRSEGSYSLQAYLKEML  | .DGMVWAD             | 375                 |     |
| AEP12366.1 | .LTPA     | .TDYGTAALE        | .ADRIEAWAAGQNGFLWGEALDYFRNVVA | .ANLRLWA             | 372                 |     |
| ABC42557.1 | .PIEG     | .SDYRESYES        | .SYGLQDFAEQARGGWTPDARAFLHRS   | .HLNRWL              | 363                 |     |
| CQR59630.1 | .PLEG     | .GDYQEAYDS        | .SHGLQDFAEQAGRAWTPPEARAFHRS   | .HMRWLS              | 363                 |     |
| CAD62189.1 | .PLEG     | .GDYFTAYEA        | .SHGLQDFAEEASPAWTADARAFHRS    | .HLNRWLG             | 384                 |     |
| AET51853.1 | .PLEG     | .GDYLETYES        | .SYALQEAERVNGRAWSPDARAFHRS    | .HLNRWLG             | 368                 |     |
| SDS74742.1 | .VAEVSP   | .GPYAQMFAHFVEEFRD | .VV.GASRAPVHYRAVF             | .AELGDM              | 362                 |     |
| AMV40976.1 | .DLSGC    | .ATPCECIRR        | .VGQDLAR...GEVD.VLRRLG        | .GALREW              | 310                 |     |
| BAA96988.1 | .RLSKES   | .DTAARCYME        | .ISNMTKE...KLTAKVDPY          | .DAMVWIE             | 342                 |     |
| VDC91124.1 | .RLSKES   | .DTAARCYME        | .ISNMTKE...KLTAKVDPY          | .DAMVWIE             | 342                 |     |
| VDC80779.1 | .RHSRES   | .DTAARCYME        | .ISNMTKE...KLTAKVDPY          | .DAMVWIE             | 342                 |     |
| BAF46284.1 | .TLTKTC   | .TNAEECYIE        | .LADKVRK...GLGHIDPY           | .DGNIAWIE            | 333                 |     |
| BAT79816.1 | .SLPKKEC  | .TTAQCIVEL        | .SKQVKA...KLGKVDY             | .DAMVWIE             | 338                 |     |
| APW77263.1 | .KLPKEC   | .TTVQCYEL         | .LAKQVKA...ELTTVDPY           | .DAMVWIE             | 406                 |     |
| AAF07834.1 | .TLPKEC   | .TSVQCYEL         | .AKLVRE...KLGKVDY             | .TGMVWIE             | 353                 |     |
| VDC81582.1 | .ALPKKEC  | .TSVQCYME         | .MAKLVE...KLGKVDY             | .DGMVWIE             | 347                 |     |
| VDD47005.1 | .TLPKEC   | .DSV              |                               |                      | 284                 |     |
| VDD27545.1 | .TLPKEC   | .DSVQCYIE         | .LAKLVKE...KLGKVDY            | .DRMVWIE             | 353                 |     |
| AAB61671.1 | .VLPKEA   | .TTVQCYIV         | .LAKLVKE...KLSKVDY            | .KLNQLWAN            | 273                 |     |
| ATG88116.1 | .VLPKDC   | .TTVQCYVEL        | .SKQVKE...KLSKVDY             | .EAMVWIE             | 336                 |     |
| ABK94330.1 | .VLPKEC   | .TTVQCYIE         | .LAKQVKE...KLGKVDY            | .DAMVWIE             | 340                 |     |
| APR63795.1 | .VLPKEC   | .TTVQCYIE         | .LAKQVKE...KLGKVDY            | .DAMVWIE             | 340                 |     |
| ACU18769.1 | .VLPKEC   | .TTVQCYIE         | .LAKQVKE...KLSKIDY            | .DAMVWIE             | 340                 |     |
| BAU01399.1 | .VLPKEC   | .TTVQCYIE         | .LAKQVKE...KLSKIDY            | .DAMVWIE             | 342                 |     |
| ACU24537.1 | .VLPKEA   | .TTVQCYIE         | .LAKQVKE...KLTAKVDPY          | .DAMVWIE             | 336                 |     |
| BAT83231.1 | .VLPKEA   | .TTVQCYIE         | .LAKQVKE...KLSKIDY            | .DAMVWIE             | 336                 |     |
| AAR13306.1 | .VLPKEA   | .TTVQCYIE         | .LAKQVKE...KLSKIDY            | .DAMVWIE             | 336                 |     |
| ABD96930.1 | .KLSKEC   | .TTVQCYIE         | .LAKQVKE...KLSIDY             | .EAMVWIE             | 346                 |     |
| ABD96890.1 | .KLPKEC   | .TTVQCYME         | .SKMVKE...KLSIDY              | .EAMVWIE             | 346                 |     |
| ABD96835.1 | .KLPKEC   | .TTVQCYIE         | .SKLVKE...KLSIDY              | .EAMVWIE             | 346                 |     |
| AAM52234.1 | .KLSKEA   | .TTVQCYIE         | .SKMVKE...KLSIDY              | .DAMVWIE             | 346                 |     |
| VDC85395.1 | .KLSKEA   | .TTVQCYIE         | .SKMVKE...KLSIDY              | .DAMVWIE             | 346                 |     |
| VDD19419.1 | .KLSKEA   | .TTVQCYIE         | .SKMVKE...KLSIDY              | .DAMVWIE             | 346                 |     |
| VDC78833.1 | .KLSKEA   | .TTVQCYIE         | .SKMVKE...KLSIDY              | .DAMVWIE             | 346                 |     |
| VDD33664.1 | .KLSKEA   | .TTVQCYIE         | .SKMVKE...KLSIDY              | .DAMVWIE             | 346                 |     |
| VDD19461.1 | .KLSKEA   | .TTVQCYIE         | .SKMVKE...KLSIDY              | .DAMVWIE             | 346                 |     |
| AAP68280.1 | .KLTKEA   | .TTVQCYIE         | .SKLVKE...KLSIDY              | .DAMVWIE             | 346                 |     |
| VDD53527.1 | .KLSKEA   | .TTVQCYIE         | .SKMVKE...KLSIDY              | .DAMVWIE             | 346                 |     |
| VDD26233.1 | .KLSKEA   | .TTVQCYIE         | .SKMVKE...KLSIDY              | .DAMVWIE             | 346                 |     |
| VDC73436.1 | .KLSKEA   | .TTVQCYIE         | .SKLVKE...KLSIDY              | .DAMVWIE             | 346                 |     |
| VDD47550.1 | .KLSKEA   | .TTVQCYIE         | .SKMVKE...KLSIDY              | .DAMVWIE             | 346                 |     |
| ACF87732.1 | .TIPKDC   | .DTVQCYIE         | .SGQVKE...KLGKIDY             | .DAMVWIE             | 346                 |     |
| ACF84514.1 | .TIPKDC   | .DTVQCYIE         | .SGQVKE...KLGKIDY             | .DAMVWIE             | 346                 |     |
| AAB49896.1 | .TIPKDC   | .DTVQCYIE         | .SGQVKE...KLGKIDY             | .DAMVWIE             | 346                 |     |
| CAA77235.1 | .TIPKEC   | .DTVQCYIE         | .LAEQVRE...KLGKIDY            | .DAMVWIE             | 346                 |     |
| AAO8217.1  | .TIPKEC   | .DTVQCYIE         | .LAEQVRE...KLGKIDY            | .DAMVWIE             | 346                 |     |
| CAA77237.1 | .SLPKKEC  | .DTVQCYIE         | .LAEQVRE...KLGKIDY            | .DAMVWIE             | 346                 |     |
| AKZ17608.1 | .TLPKEC   | .DTVQCYIE         | .LAEQVRE...KLGKIDY            | .DAMVWIE             | 346                 |     |
| AFK49282.1 | .TLPKDC   | .TSVQCYIE         | .LAEQVRE...KLGKIDY            | .DAMVWIE             | 339                 |     |
| AAB88408.1 | .TLPKDC   | .TSVQCYIE         | .LAEQVRE...KLGKIDY            | .DAMVWIE             | 339                 |     |
| CAC83750.1 | .ALPKDC   | .TTVQCYIE         | .LAEQVRE...KLGKIDY            | .DAMVWIE             | 338                 |     |
| CAN69560.1 | .ILPKKEC  | .TTVQCYIE         | .LAEQVRE...KLGKIDY            | .DAMVWIE             | 338                 |     |
| AGE46030.1 | .VLPKDC   | .TTVQCYIE         | .LAEQVRE...KLGKIDY            | .DAMVWIE             | 341                 |     |
| CDM84286.1 | .KLTKEC   | .DTVQCYIE         | .LAEQVRE...KLGKIDY            | .DAMVWIE             | 333                 |     |
| AKZ17610.1 | .KLTKEC   | .DTVQCYIE         | .LAEQVRE...KLGKIDY            | .DAMVWIE             | 333                 |     |
| QAX90478.1 | .TLPKDC   | .DTVQCYIE         | .LAEQVRE...KLGKIDY            | .DAMVWIE             | 338                 |     |
| AJD87532.1 | .TLPKDC   | .DTVQCYIE         | .LAEQVRE...KLGKIDY            | .DAMVWIE             | 337                 |     |
| AKZ17609.1 | .TLPKDC   | .DTVQCYIE         | .LAEQVRE...KLGKIDY            | .DAMVWIE             | 338                 |     |
| BAC83877.1 | .SLPKKEA  | .TTVQCYIE         | .LAEQVRE...KLGKIDY            | .DSMVWIE             | 344                 |     |
| ACG33746.1 | .SLPKKEA  | .TTVQCYIE         | .LAEQVRE...KLGKIDY            | .DSMVWIE             | 340                 |     |
| CAC84517.1 | .TLPKDC   | .TSVQCYIE         | .LAEQVRE...KLGKIDY            | .DAMVWIE             | 340                 |     |
| ABK21236.1 | .TLPKEC   | .TSVQCYIE         | .LAEQVRE...KLGKIDY            | .DAMVWIE             | 338                 |     |
| CAB64206.2 | .TLPKEC   | .TSVQCYIE         | .LAEQVRE...KLGKIDY            | .EAMVWIE             | 336                 |     |
| AFX67042.1 | .TLPKEC   | .TSVQCYIE         | .LAEQVRE...KLGKIDY            | .EAMVWIE             | 336                 |     |
| AAT44738.1 | .TLPKEC   | .TSVQCYIE         | .LAEQVRE...KLGKIDY            | .DAMVWIE             | 336                 |     |
| AFK42305.1 | .TLPKDC   | .TSVQCYIE         | .LAEQVRE...KLGKIDY            | .DAMVWIE             | 248                 |     |
| AFK40119.1 | .TLPKDC   | .TSVQCYIE         | .LAEQVRE...KLGKIDY            | .DAMVWIE             | 338                 |     |
| ACU19796.1 | .TLPKDC   | .TSVQ             | .KKKKK                        |                      | 315                 |     |
| ACU23018.1 | .TLPKEC   | .TSVQCYIE         | .LAEQVRE...KLGKIDY            | .DAMVWIE             | 342                 |     |
| AAB61672.1 | .TLPKEC   | .TSVQCYIE         | .LAEQVRE...KLGKIDY            | .DAMVWIE             | 310                 |     |
| BAT99160.1 | .TLPKDC   | .TSVQCYIE         | .LAEQVRE...KLGKIDY            | .DAMVWIE             | 340                 |     |
| AGV54358.1 | .TLPKDC   | .TSVQCYIE         | .LAEQVRE...KLGKIDY            | .DAMVWIE             | 340                 |     |
| BAF16057.1 | .KLSSTS   | .VTVEDCVKEL       | .TSIVKE...KLGKIDY             | .DAMEWTK             | 337                 |     |
| CAA77234.1 | .KLSSTS   | .VTVEDCVKEL       | .TSIVKE...KLGKIDY             | .DAMEWTK             | 337                 |     |
| ACF86668.1 | .KLSRTA   | .VTVEDCVKEL       | .AGIVRE...KLGKIDY             | .DAMVWNN             | 339                 |     |
| ACG43402.1 | .KLSRTA   | .VTVEDCVKEL       | .AGIVRE...KLGKIDY             | .DAMVWNN             | 339                 |     |
| AKZ17611.1 | .KLSRTA   | .VTVEDCVKEL       | .AGIVRE...KLGKIDY             | .DAMVWNN             | 339                 |     |
| BAJ88947.1 | .KLSRTA   | .VTVEDCVKEL       | .AGIVRE...KLGKIDY             | .DAMEWTK             | 338                 |     |
| SPT20324.1 | .KLSRTA   | .VTVEDCVKEL       | .AGIVRE...KLGKIDY             | .DAMEWTK             | 338                 |     |
| CAA77236.1 | .KLSRTA   | .VTVEDCVKEL       | .AGIVRE...KLGKIDY             | .DAMEWTK             | 338                 |     |
| CAN80500.1 | .RLSQAA   | .VTTEDCVL         | .ETVALVE...RLATLDPY           | .QAMADWK             | 496                 |     |
| ABD28560.1 | .KLPQSA   | .TTAEDCVI         | .EMAKSVKE...RLGKVDY           | .DAMVWVK             | 339                 |     |
| AAM66046.1 | .KLPETA   | .LKVVEDCVI        | .EMAKSVKE...QLGSDPA           | .DAMVWVQ             | 339                 |     |
| VDD33573.1 | .KLPESA   | .VNVEDCVV         | .EMAKSVKE...QLGSDPA           | .DAMVWVQ             | 339                 |     |
| VDD19317.1 | .KLPESA   | .VNVEDCVV         | .EMAKSVKE...QLGSDPA           | .DAMVWVQ             | 339                 |     |
| AJA92657.1 | .TLET     | .NDYTSQFL         | .ETADWLK...TSKNNNSLKF         | .ESYGGWK             | 327                 |     |
| AOV94704.1 | .PDQA     | .EDYFEAYE         | .EMIKAVDN...FDFSADYANADF      | .KHMKML              | 371                 |     |
| CAJ52658.1 | .SADA     | .TTWTEAATAMAT     | .ALSE...GDFERLTNGAF           | .EYWLWLC             | 369                 |     |
| CCC40659.1 | .SADA     | .TTWTEAATAMAT     | .ALSE...GDFERLTNGAF           | .EYWLWLC             | 369                 |     |
| AEN04839.1 | .GAGA     | .ESFREAFDAMAD     | .ALVA...GDFEENNGAF            | .EYKDWLD             | 367                 |     |
| AZH26594.1 | .GSDA     | .ETIYAGVFA        | .AMADALVD...AEADYRNGDF        | .EYKDWLD             | 367                 |     |
| AXG07954.1 | .GADA     | .DTIYAGVFE        | .AMADALD...AEADYRNGDF         | .EYKDWLD             | 367                 |     |
| AXG11367.1 | .GADA     | .DTIYAGVFE        | .AMADALD...AEADYRNGDF         | .EYKDWLD             | 367                 |     |
| AUV82097.1 | .GAGS     | .ETIYAEAF         | .RAMADRLA...GDFSDLNNGAF       | .EYKDWLD             | 368                 |     |
| AWB26477.1 | .GSEA     | .DDYASVAR         | .ADRLEA...ADSDAYRNGDF         | .EYKDWLD             | 378                 |     |
| AQL44377.1 | .GDDA     | .DSYAGVFA         | .AMADAMA...GDFD.YENAAF        | .EYKDWLD             | 367                 |     |
| AGN01787.1 | .EPAAISEG | .SIDRDA...AAVPSPE | .SFAAVFEAMGHE                 | .LAT...GDYSQRWNG     | .EYKDWLD            | 385 |
| ADQ67080.1 | .GSDA     | .TTWTEA           | .EAMADALAD...GDFAKWNG         | .GAFLNHCG...EFWRDLA  | 369                 |     |
| AUG47369.1 | .GADA     | .DSYAEV           | .FDIAVAMAD...GDFS DWENG       | .GAFLNHCG...EFWRDLA  | 368                 |     |
| AAV45881.1 | .GADA     | .DSYAEV           | .FDIAVAMAD...GDFS DWENG       | .GAFLNHCG...EFWRDLA  | 368                 |     |
| AEM57147.1 | .GADA     | .DSYAEV           | .FDIAVAMAD...GDFS DWENG       | .GAFLNHCG...EFWRDLA  | 368                 |     |
| AHB65933.1 | .GADA     | .DSYAEV           | .FDIAVAMAD...GDFS DWENG       | .GAFLNHCG...EFWRDLA  | 368                 |     |
| AJF27072.1 | .GADA     | .DSYAEV           | .FDIAVAMAD...GDFS DWENG       | .GAFLNHCG...EFWRDLA  | 368                 |     |
| ACV48390.1 | .GDDA     | .DSYAGV           | .FAMARALA...GDFDDWENG         | .GAFLNHCG...EYKDWLD  | 365                 |     |
| ADJ15312.1 | .DPDA     | .GSIYAEV          | .YAMGRRLE...SEWDSYRNG         | .GDFLNHCG...EYKDWLD  | 368                 |     |
| CCQ37667.1 | .EPDVDE   | .SEDA...DRYAAV    | .FEAMARLA...GFEAYRNG          | .GDFLNHCG...EYKDWLD  | 385                 |     |
| AFK19498.1 | .ERTSSAHR | .MQSGDDA...DSYAAV | .FEAMADALAD...GDFS DYRNG      | .GDFLNHCG...EYKDWLD  | 384                 |     |
| AHZ21160.1 | .ERTSSAHR | .MQSGDDA...DSYAAV | .FEAMADALAD...GDFS DYRNG      | .GDFLNHCG...EYKDWLD  | 384                 |     |
| ADE03063.1 | .GGDA     | .DSYAGV           | .FEAMADALAD...GDFS DYRNG      | .GDFLNHCG...EYKDWLD  | 369                 |     |
| AKU07755.1 | .GDDA     | .DSYAGV           | .FEAMADALAD...GDFS DYRNG      | .GDFLNHCG...EYKDWLD  | 369                 |     |
| ACM55766.1 | .GADA     | .DDYVAV           | .YDAMADRLTD...SEFDEYRNG       | .GAFLNHCG...EYKDWLD  | 379                 |     |
| QAU13129.1 | .GADA     | .DSFEAA           | .FAMADALAD...GDFS WNS         | .GAFLNHCG...EYKDWLD  | 379                 |     |
| AZQ13471.1 | .GADA     | .DSYAAV           | .FDAMADALAD...GDFS WNS        | .GAFLNHCG...EYKDWLD  | 379                 |     |
| QAY18675.1 | .GADA     | .DSYAAV           | .FDAMADALAD...GDFS WNS        | .GAFLNHCG...EYKDWLD  | 379                 |     |
| ATW88543.1 | .DPDSDA   | .DPYARIFA         | .MAAEELAD...GDWSEYNG          | .GDFLNHCG...EYKDWLD  | 371                 |     |
| AGB17244.1 | .GDDA     | .DSYAEAF          | .EAMGRELAR...GDWDEF           | .TNGDFLTHV...EYKDWLD | 371                 |     |
| AEH36670.1 | .GADA     | .DSYADV           | .FEAMARELVD...GDWSDYRNG       | .GDFLNHCG...EYKDWLD  | 371                 |     |
| APW97619.1 | .EPEVPR   | .QPAEPTEDDAGED    | .ADSYADVFEAMARE               | .LAD...GDWSEYNG      | .GDFLNHCG...EYKDWLD | 389 |
| AF057429.1 | .GDDA     | .DSYAGV           | .FEAMADELAD...GDWSEYNG        | .GDFLNHCG...EYKDWLD  | 371                 |     |
| AGB30672.1 | .GSDA     | .DSYAAV           | .FEAMARELAD...GDWDDYNG        | .GDFLNHCG...EYKDWLD  | 371                 |     |
| ACV12047.1 | .GDNA     | .DSYAEV           | .ARAVAEFQT...SADDEWEN         | .ADFLAYCG...EYKDWLD  | 367                 |     |
| CCQ33920.1 | .GADA     | .DSYAGV           | .ARAVAEELRT...SADDEWEN        | .ADFLAYCG...EYKDWLD  | 367                 |     |
| AAP19356.1 | .DPAT     | .ETIYAGV          | .AEVGRRLAD...GEYDSYNG         | .GAFLNHCG...EYLLDWA  | 317                 |     |
| CAP13627.1 | .DPAT     | .ETIYAGV          | .AEVGRRLAD...GEYDSYNG         | .GAFLNHCG...EYLLDWA  | 366                 |     |
| AHG03719.1 | .EVGEQS   | .YAAVARAV         | .GGERLAE...GDYEEYNG           | .GAFLNHCG...EYLLDWD  | 366                 |     |
| CQH54592.1 | .EPDE     | .DSYEA            | .VARAVGERLVE...SDYEEYNG       | .GAFLAECG...EYLLDWD  | 366                 |     |



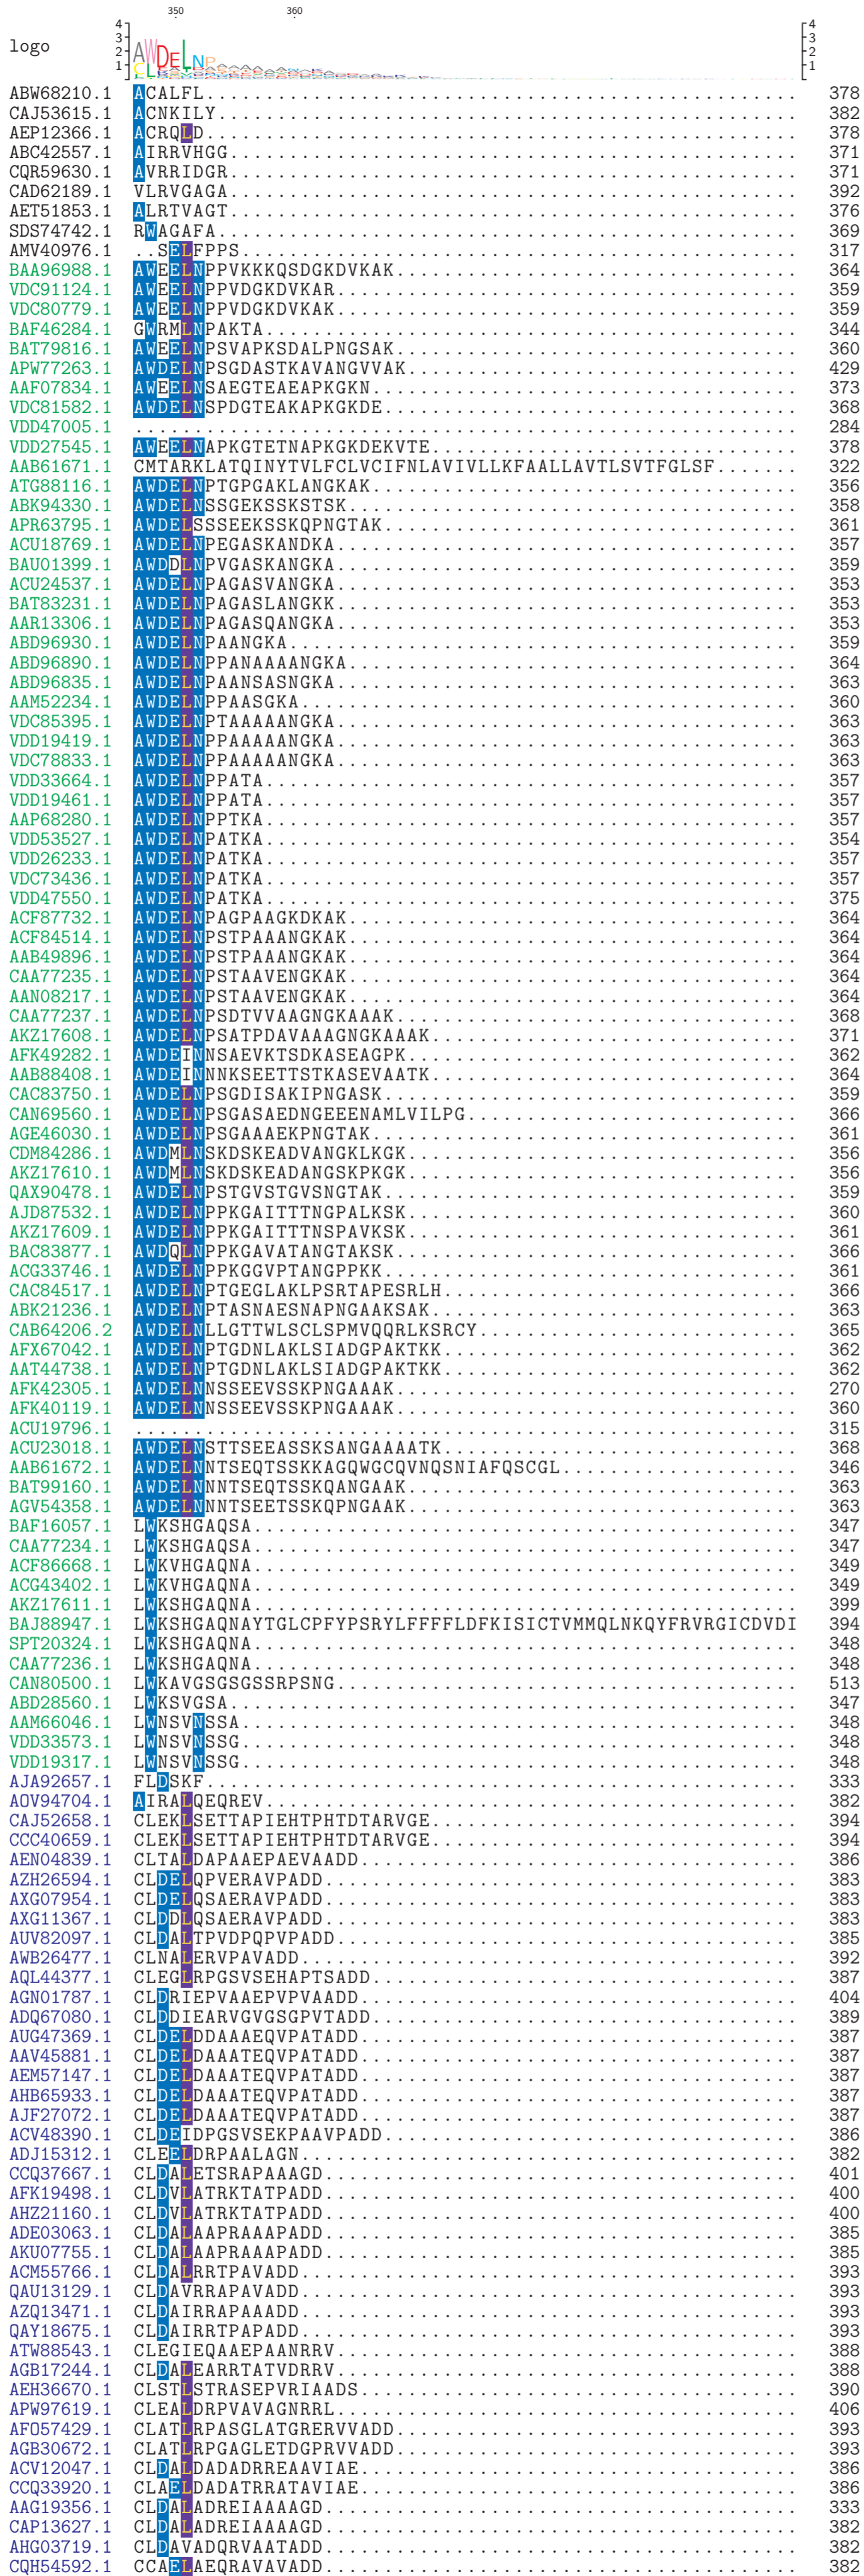



 non-conserved  
  $\geq 50\%$  conserved  
  $\geq 70\%$  conserved
